## Original Paper

Subject category: Systems biology

### GeoWaVe: Geometric median clustering with weighted voting for ensemble clustering of cytometry data

5

Ross J. Burton<sup>1,2,\*</sup>, Simone M. Cuff<sup>1</sup>, Matt P. Morgan<sup>2</sup>,

Andreas Artemiou<sup>3,†</sup>, Matthias Eberl<sup>1,4,†</sup>

*<sup>1</sup>Division of Infection and Immunity, School of Medicine, Cardiff University, Cardiff CF14  
10 4XN, United Kingdom; <sup>2</sup>Adult Critical Care, University Hospital of Wales, Cardiff and Vale  
University Health Board, Cardiff CF14 4XW, United Kingdom; <sup>3</sup>School of Mathematics,  
Cardiff University, Cardiff CF24 4AG, United Kingdom; <sup>4</sup>Systems Immunity Research Institute,  
Cardiff University, Cardiff CF14 4XN, United Kingdom*

15 \* To whom correspondence should be addressed.

† The authors wish it to be known that, in their opinion, the last two authors should be regarded  
as Joint Senior Authors.

20 **Key words:** Cytometry bioinformatics, clustering analysis, immunophenotyping, Python,  
ensemble clustering, consensus clustering, single cell analysis

## Abstract

25 **Motivation:** Clustering is an unsupervised method for identifying structure in unlabelled data. In the context of cytometry, is typically used to categorise cells into subpopulations of similar phenotype. However, clustering is greatly dependent on hyperparameters and the data to which it is applied as each algorithm makes different assumptions and generates a different ‘view’ of the dataset. As such, the choice of clustering algorithm can significantly influence results, and  
30 there is often not one preferred method but different insights to be obtained from different methods. To overcome these limitations, consensus approaches are needed that directly address the effect of competing algorithms, which to our knowledge has not been applied to cytometry.

**Results:** We present a novel ensemble clustering methodology based on geometric median clustering with weighted voting (GeoWaVe). Compared to graph ensemble clustering methods  
35 that have gained popularity in scRNA-seq analysis, GeoWaVe performed favourably on different sets of high-dimensional mass and flow cytometry data. Our findings provide proof of concept for the power of consensus methods to make the analysis, visualisation and interpretation of cytometry data more robust and reproducible. The wide availability of ensemble clustering methods is likely to have a profound impact on our understanding of  
40 cellular responses, clinical conditions, and therapeutic and diagnostic options.

**Availability and implementation:** GeoWaVe is available as part of the CytoCluster package <https://github.com/burtonrj/CytoCluster>.

**Contact:** [Ross.Burton@wales.nhs.uk](mailto:Ross.Burton@wales.nhs.uk)

## 45 **1 Introduction**

Clustering is an unsupervised method for identifying structure in unlabelled data. In the context of cytometry, the objective is to categorise events into groups of similar phenotype. This technique is increasingly being adopted in the field and is widely regarded as an acceptable alternative to manual analysis [1-3]. However, the choice of algorithm appears to be often  
50 driven either by its availability in commercial software or ease of its use. In many instances the reason behind the particular choice of algorithm is not discussed at all. Of note, clustering algorithms differ in the assumptions made of data, their performance tends to be highly data-specific and results can vary widely depending on the chosen hyperparameters [4-6].

Ensemble clustering (also referred to as consensus clustering) offers an opportunity to reduce  
55 this frequently encountered bias by combining the partitions of multiple clustering algorithms run on the same data to identify a consensus that is informed by multiple 'views', thereby reducing the dependence on any individual algorithm. Unlike ensemble methods in supervised classification, ensemble clustering has many challenges: the number of clusters may differ amongst the base partitions, the optimal number of consensus clusters is often unknown, and it  
60 is necessary to solve the correspondence issue of matching clusters between individual partitions [4, 7].

Broadly speaking, ensemble clustering methods can be grouped into three categories: co-association methods, feature-based methods and methods using graph representations [4, 7, 8].

Co-association methods act on the pairwise similarity of clusters sourced from different  
65 algorithms. Consensus solutions can be derived from simple techniques such as agglomerative clustering of the binary co-association matrix ( $N \times N$  matrix, where  $N$  is the number of events, for instance the number of single cells) [5] or the cluster-based similarity partitioning algorithm (CSPA), that forms partitions on the derived similarity graph using the METIS software [9].

Methods that act on co-association are burdened by space complexity and are therefore  
70 intractable for large data where such a matrix exceeds the available computer memory [4].

Feature-based methods offer an alternative by presenting the problem as a label-association matrix ( $m \times n$  matrix, where  $m$  is the number of unique clusters). Consensus solutions can be formulated with iterative voting, finite mixture models, pairwise agreement between clusters, or agglomerative clustering of this label-association matrix [7].

75 Another popular approach for consensus clustering is by using graph-based methods, where a weighted graph of the clusters contributing to an ensemble is generated and then partitioned into  $k$  parts using a graph partitioning technique [4, 7]. Strehl and Ghosh [9] developed the hyper-graph partitioning algorithm (HGPA) and the meta-clustering algorithm (MCLA), both heuristics that represent the clustering ensemble as a hypergraph. Later the hybrid bipartite  
80 graph formulation (HBGF) algorithm was introduced as an alternative approach that models clusters and observations in the same graph. In each case, consensus partitions are constructed from a subsequent bipartite graph [10]. The advantage of the aforementioned graph methods is their heuristic approach that avoids the need for a co-association matrix, making them applicable to large data.

85 Ensemble clustering methods have successfully been adopted in the field of single-cell RNA sequencing (scRNA-seq) but the methodologies chosen usually reflect the size of data generated by this technique and do not address the space complexity issues that arise from larger datasets. the graph partitioning-based ensemble method for single-cell clustering, Sc-GPE [11], is an example of a solution deploying co-association to the problem of ensemble  
90 clustering, where a co-association matrix is weighted by the similarity (adjusted rand index) of contributing clustering methods. However, the dependence on a co-association matrix makes this technique intractable for cytometry data. The same limitation applies to SC3 [12], another

consensus approach for scRNA-seq employing CSPA for ensemble clustering. Single-cell aggregated (from ensemble) clustering (SAFE-clustering) [13] avoids the need for generating  
95 a co-association matrix by applying graph-based methods instead but the implementation only allows a limited number of contributing algorithms to the consensus and is exclusively designed for scRNA-seq.

In contrast to these advances in scRNA-seq data analysis, ensemble clustering methods have yet to be applied to cytometry data. Of note, methods developed for scRNA-seq data analysis  
100 may not scale to the size of data encountered in cytometry data analysis, which can be hundreds of times greater. We here benchmarked a range of graph ensemble clustering methods against popular clustering algorithms for cytometry data analysis and present a novel ensemble clustering methodology based on geometric median clustering with weighted voting (GeoWaVe). Compared to graph ensemble clustering methods that have gained popularity in  
105 scRNA-seq analysis, GeoWaVe performed favourably on different sets of high-dimensional data generated using cytometry by time of flight (CyTOF) or multicolour flow cytometry. Our findings provide proof of concept for the power of consensus methods to make cytometry data analysis more robust and reproducible.

## 110 **2 Materials and methods**

### **2.1 Datasets**

Public CytTOF datasets were obtained from open-source repositories [2] and arc-sinh transformed with a standard cofactor of 5. Doublets, debris and dead cells were removed, and ground-truth labels were taken from the original publications, with manual gating by the  
115 authors of the *Levine-13* [14], *Levine-32* [14] and *Samusik* [15] datasets. An in-house generated

12-colour flow cytometry dataset was derived from nine patients admitted with acute severe sepsis to the Adult Intensive Care Unit at the University Hospital of Wales in Cardiff, United Kingdom (see **Supplementary Methods**). *Sepsis* data were arc-sinh transformed (standard cofactor of 150) and batch effect corrected using the Harmony algorithm [16]. Each sample  
120 was manually gated for single live CD4<sup>+</sup> and CD8<sup>+</sup> T cells, Vδ2<sup>+</sup> γδ T cells and CD161<sup>+</sup> Vα7.2<sup>+</sup> mucosal-associated invariant T (MAIT) cells. The identified lymphocyte populations then served as a ground-truth for comparison of results from the clustering algorithms.

## 2.2 Base clustering

The following base clustering algorithms were considered individually, and their outputs  
125 served as input to ensemble clustering: FlowSOM (“self-organising map”) [17], PHATE (“potential of heat-diffusion for affinity-based trajectory embedding”) [18] with *k*-means clustering, SPADE (“spanning-tree progression analysis of density-normalized events”) [19], Phenograph [14] and PARC (“phenotyping by accelerated refined community-partitioning”) [20]. These algorithms are computationally efficient and have shown good performance for  
130 cytometry data analysis. The output of the base clustering algorithms was used to generate a label-association matrix as input for MCLA, HGPA and HBGF, three graph ensemble clustering algorithms that have been successfully applied to scRNA-seq data [13]. For each base clustering algorithm, experimentation with multiple input parameters was performed to give the best possible performance. The number of clusters generated for each method was  
135 determined either as a property of the clustering method (as is the case with Phenograph and PARC), selected from a range of 3-50 using the popular ConsensusClusterPlus method [21], or a fixed value of 20 clusters. The output of the base clustering algorithms was used to generate a label-association matrix (*m* clusters × *n* observations), which served as input for the MCLA,

HGPA and HBGF graph ensemble clustering algorithms as implemented using the  
140 ClusterEnsembles Python package [22].

### 2.3 Ensemble clustering

For graph ensembles, a required hyperparameter is the number of final partitions in the consensus solution. This problem was addressed in the base clustering algorithms by searching a range of possible clusters and using ConsensusClusterPlus. This approach required sub-  
145 sampling the feature space and computing the co-association matrix for each value of  $k$  (the number of clusters). The cumulative distribution function (CDF) for each co-association matrix was generated, and the optimal  $k$  chosen where the CDF is maximum. This was applicable to methods such as FlowSOM and SPADE that use a heuristic or down-sampled feature space but was intractable for graph-based consensus clustering techniques that construct graph  
150 representations of a  $m \times n$  label-association matrix. Therefore, the optimal number of consensus partitions was chosen using internal metrics (metrics that use internal information from the clustering process to evaluate the quality of a clustering, *e.g.* the variation within clusters or the degree of overlap between clusters). Ensemble clustering was repeated over a range of  $k$ ; chosen as the smallest and largest number of clusters amongst base clustering algorithms. Four  
155 internal metrics, implemented in Scikit-Learn [23], were chosen for their ease of interpretation: Calinski-Harabasz score, Davies-Bouldin index, distortion score and silhouette coefficient. Internal metrics were measured for 1000 events with 100 resamples and the distributions plotted for each  $k$ . The performance of clustering algorithms in comparison to ensemble methods was evaluated using external metrics that compare cluster results to ground-truth  
160 labels, implemented in the Scikit-Learn library [23]: Adjusted Rand Index (ARI), Fowlkes-Mallows Index (FMI) and Adjusted Mutual Information (AMI).

## 3 Results

### 3.1 Graph ensemble clustering methods fail to outperform individual clustering algorithms for cytometry data analysis

165

Ensemble clustering solutions should take input from informative algorithms suited to the analytical task in question. We here sought to benchmark ensemble methods from the literature using externally and internally generated data, in particular ensemble methods that scale to large cytometry data (greater than 100,000 data points), namely graph-based methods.

170

Base clustering algorithms and ensemble methods were tasked with clustering three datasets with available ground-truth labels. The *Levine-13* data describe a total of 265,627 bone marrow cells from two healthy human donors and include 13 parameters (**Supplementary Figure S1**)

[14]. *Levine-32* describes 167,044 bone marrow cells from a single healthy human donor but at higher resolution with 32 CyTOF parameters (**Supplementary Figure S2**) [14]. Some

175

examples of challenges presented by these two datasets include overlapping monocyte subsets differentiated by CD11b expression in the *Levine-13* data, and small subsets of B-cells differentiated by IgM and IgD expression in the *Levine-32* data. The *Samusik* data describe

bone marrow samples with a total of 841,644 cells from 10 C57BL/6J mice and identified 24 populations using 39 CyTOF parameters (**Supplementary Figure S3**) [15]; the branching

180

topology of which offers a unique challenge to any clustering algorithm aiming to partition data in meaningful ways (**Figure 1**). In addition to these three CyTOF datasets, we used an in-

house generated 12-colour flow cytometry dataset from sepsis patients (**Supplementary Figure S4**) where the challenge was to identify relatively small and ambiguous populations of

unconventional T cells amongst the backdrop of classical CD4<sup>+</sup> and CD8<sup>+</sup> T cells (**Figure 1**).

185

When evaluating the performance of base clustering algorithms in comparison to graph ensemble methods, MCLA offered greater performance compared to the other graph ensemble



methods as judged by the adjusted rand index (ARI; **Figure 2**), Fowlkes-Mallows index (FMI; **Supplementary Figure S5**) and adjusted mutual information (AMI; **Supplementary Figure S6**). In the case of the *Levine-13* and *Levine-32* datasets, MCLA provided similar performance  
190 to the popular FlowSOM algorithm but overall graph ensemble methods failed to outperform one or more of the base clustering algorithms for all four benchmark datasets.

To test whether the performance of graph ensemble methods was a direct result of the method employed for selecting  $k$ , the number of final consensus clusters (*i.e.* the use of internal metrics as shown in **Supplementary Figure S7**), the performance of graph-based clustering algorithms  
195 was examined across different values of  $k$  using external evaluation metrics. HBGF was chosen because it had the best runtime of the three graph ensemble methods (**Supplementary Figure S8**). Here, performance was optimum for low values of  $k$  despite the number of ground-truth populations being much larger for the *Levine-13* and *Samusik* datasets. The choice of  $k$  was therefore assumed not to be a factor in the poor performance of graph ensemble methods in  
200 this case. Taken together, our findings demonstrate that graph ensemble clustering methods for mass and flow cytometry data performed worse than one or more contributing base clustering solutions.

### **3.2 Geometric median clustering with weighted voting (GeoWaVe): a novel heuristic 205 ensemble clustering algorithm**

Graph ensemble methods address issues of computational complexity by deriving the consensus from graph representations of the label-association matrix, rather than from the unmanageable co-association matrix. To improve the performance of consensus approaches, we propose an alternative heuristic ensemble clustering method: geometric median clustering  
210 with weighted voting (GeoWaVe), where the clusters generated by base clustering algorithms

contributing to an ensemble (such as the examples used in this study, see **Figure 3A**) are summarised by their geometric median (**Figure 3B**). The geometric median (implemented with the `hdmedians` package [24] and formally defined in **Equation 1**) was chosen over other measures of central tendency because it is robust to outliers, is not necessarily a point from the original data, can handle negative values and is defined in any dimension.

$$\hat{u} = \operatorname{argmin} \sum_{i=1}^n \|x - x_i\|$$

Using his approach, a summary of the expression profile of all clusters contributing to the consensus is generated, which can subsequently be clustered into consensus clusters (**Figure 3C**); a consensus cluster being a collection of clusters of similar phenotype. The clusters that contribute to a consensus are overlapping sets, given that each base clustering algorithm is exposed to the same data. Therefore, it is possible that an event can be assigned to more than one consensus cluster. This will occur more frequently for events that sit on the boundary between clusters. To solve this problem, where an event is assigned to multiple consensus clusters a score is calculated for each consensus cluster and the event assigned to the consensus with the maximum score.

The consensus cluster score is calculated as follows: given that a consensus cluster can be defined as a set of clusters  $C$ , the Manhattan distance between an event  $x$  and the geometric median (**Equation 1**) of each cluster is computed. The sum of these distances is then divided by the number of clusters within the consensus, given a weighting factor,  $p$ . This can be expressed formally as **Equation 2**:

$$p = \frac{\sum_{c \in C} \|\hat{u}(x) - \hat{u}(c_i)\|_1}{|C|}$$

The final score is calculated as the number of clusters within the consensus divided by  $p$  (Equation 3):

$$score = \frac{|C|}{p}$$

Not all clusters are equally defined, and some may be a poor fit for a given event. To account for this possibility, the majority voting algorithm is weighted by the distance from an event to the centre of each cluster that contributes to a consensus. This method ensures that the consensus an event is assigned to was informed by both the number of supporting algorithms but also the quality of the clusters in that consensus.

The choice of clustering algorithm applied to the geometric medians of clusters is ambiguous in that any number of existing methods may be suitable to the task. The advantage of geometric medians as a heuristic is that the expression profile can be visualised easily as a heatmap (Figure 3C) and different clustering methods can be applied and critiqued. This allows the investigator to introduce prior knowledge, such as known phenotypes expected to occur in the data.

### 3.3 Validation of GeoWaVe

To validate GeoWaVe, multiple algorithms for clustering the geometric medians were tried. Affinity propagation and mean-shift were compared because of their ability to select the optimal number of clusters from characteristics of the data.  $k$ -means and agglomerative hierarchical clustering were also tested, with the optimal number of clusters chosen from a range of clusters using the ConsensusClusterPlus method [21]. For agglomerative hierarchical clustering a variety of linkage methods and distance metrics were tried.

GeoWaVe performance was compared to base clustering algorithms and graph ensemble methods using external evaluation metrics. GeoWaVe outperformed all other methods in three of the four datasets when comparing ARI (**Figure 2**) and FMI (**Supplementary Figure S5**). GeoWaVe also outperformed graph ensemble methods when comparing ARI, FMI and AMI  
260 (**Supplementary Figure S6**) but failed to outperform base clustering methods in terms of AMI in the *Levine-13* and *Samusik* data.

The effect of the choice of clustering algorithm applied in GeoWaVe was data specific. For the *Levine-13* and *Levine-32* data, the choice of algorithm was negligible whereas *k*-means and agglomerative hierarchical clustering with average linkage showed a clear advantage in the  
265 *Sepsis* data.

### 3.4 GeoWaVe outperforms graph ensemble methods

External evaluation metrics used in the prior section offer performance criteria that are independent of the labels, *i.e.* they do not require a like-to-like matching of cluster and ground-  
270 truth labels. Instead, measures of similarity between the cluster labels and ground-truth labels were used. Samusik *et al.* [15] and Webber *et al.* [5] alternatively framed such problems in the context of a classification task: a one-to-one mapping of ground-truth labels to clusters was achieved using the Hungarian algorithm such that the sum of F1 scores across ground-truth labels is maximised, and the precision (positive predictive value), recall (sensitivity) and F1  
275 score (harmonic mean of precision and recall) for each ground-truth label are reported.

This procedure was repeated for the clustering algorithms bench-marked in previous sections and the ensemble clustering solutions. **Figure 4** shows the average precision, recall and F1 score for the base clustering algorithms, graph ensemble methods and GeoWaVe with bootstrapped 95% confidence intervals from 1000 rounds of re-sampling. GeoWaVe continued

280 to outperform graph ensemble methods across the four benchmark datasets but failed to match the F1 score obtained by methods such as PhenoGraph and PARC in the *Levine-32* and *Samusik* datasets. While MCLA graph ensemble clustering was more comparable to GeoWaVe in the *Sepsis* data when observing F1 score, GeoWaVe with *k*-means clustering still outperformed MCLA in terms of precision, recall and F1 score.

285 An advantage to matching clusters to ground-truth populations using the Hungarian algorithm was the ability to directly compare the performance at the population level. The F1 score for ground-truth populations is shown as a heatmap for the Levine data in **Figure 5** and compares the performance between graph ensemble clustering and GeoWaVe. Each row includes a measure of the population size as an additional heatmap on the y-axis. This approach

290 demonstrated how the superior performance of GeoWaVe compared to graph ensemble methods was a result of improved identification of under-represented populations such as plasma cells and plasmacytoid dendritic cells in the *Levine-13* dataset, and plasma cells, basophils and CD16<sup>+</sup> natural killer cells in *Levine-32*. The ability of GeoWaVe to outperform graph ensemble methods is supported by observations in the *Samusik* data (**Figure 6**) where

295 multiple populations of moderate size were absent from the output of graph ensemble methods but could successfully be identified by GeoWaVe; examples include natural killer T cells, macrophages and non-classical monocytes. Despite the success of GeoWave in comparison to graph ensemble methods, it still failed to identify very rare subsets in high-dimensional data, for example platelets in the Levine13 dataset and CD34<sup>+</sup> CD38<sup>+</sup> CD123<sup>+</sup> haematopoietic stem

300 and progenitor cells in the *Levine-32* dataset. However, while graph ensemble methods performed better on the *Sepsis* data compared to the other three datasets, minor populations of V $\delta$ 2<sup>+</sup>  $\gamma$  $\delta$  T cells and MAIT cells were more reliably identified by the GeoWaVe algorithm.

## 4 Discussion

305 Cytometry has become a cornerstone to biomedical and healthcare research and is widely used  
in clinical diagnosis. In many pathological conditions, the understanding of disease  
mechanisms and how to exploit them for patient benefit relies largely on cytometry, including  
the diagnosis of conditions like leukaemia and HIV infection, and studying antigen-specific  
responses in vaccine trials. Historically, cytometry data have been processed and analysed  
310 manually. Until recently, this was deemed acceptable given that cytometry instruments could  
only accommodate relatively few parameters in any experiment. Over the past decade,  
however, the number of available parameters has increased drastically with the advent of  
multicolour flow cytometry and mass cytometry, allowing characterisation of even minor  
populations at single cell level and the discovery of novel cell types and new functional  
315 features. Traditional approaches no longer suffice – as the number of parameters grows, data  
analysis is becoming more labour intensive, more subjective and harder to standardise and  
reproduce across studies and sites. In response to the technological advances, the domain of  
cytometry bioinformatics is rapidly evolving to provide new computational solutions for data  
analysis and interpretation such as autonomous gating, supervised classification and  
320 unsupervised clustering. Arguably the most impactful technology introduced to this space is  
dimension reduction for the purpose of data visualisation, such as *t*-distributed stochastic  
neighbourhood embedding (*t*-SNE), uniform manifold approximation and projection (UMAP)  
and PHATE. The top clustering algorithms alone have already amassed >12k citations in the  
scientific literature within a few years and are enabling researchers to make rapid progress in  
325 their fields – for instance in the understanding of the immunopathology of COVID-19 that  
rapidly translated into novel therapies, outcome prediction and vaccine development [25-28].

We here developed GeoWaVe, an ensemble clustering algorithm, as a solution to reduce the variance commonly observed amongst clustering methods in the cytometry literature, where results depend upon hyperparameter choice and the particular context in which they are applied. Presently, there is an absence of a “one size fits all” solution to clustering cytometry data, leaving scientists to rely on exploratory analysis that risks biasing results through data dredging [28]. Ensemble clustering offers an alternative by finding a consensus informed by the results of multiple clustering algorithms exposed to the same data. This multi-view approach theoretically offers robust, consistent and stable solutions [4, 8] without biasing the analysis with the assumptions of a single algorithm. The act of employing ensemble clustering also forces the analyst to compare and contrast the results of multiple algorithms, which can be an informative exercise.

Ensemble clustering presents many challenges that come to bear when applied to complex data such as those generated with cytometry. Unlike supervised classification, there are not a defined number of classes provided by labelled examples. Different algorithms may generate different quantities of clusters, which must be compared and consolidated into consensus clusters. Cytometry data also tends to generate large data that can be difficult to handle with conventional computer resources. This is becoming increasingly relevant for studies that intend on phenotyping hundreds or even thousands of subjects.

An existing ensemble approach that can scale to large data and was included in this study are the graph-based methods, such as HGPA, MCLA and HBGF. These techniques were benchmarked against four independent datasets but failed to outperform individual clustering algorithms such as FlowSOM, PhenoGraph, or SPADE. In response to this, an alternative heuristic ensemble method named GeoWaVe was developed, which was suitable to the nature of cytometry data. Given that the dimensions of cytometry data are not beyond the comprehension of the investigator and meaningful phenotypes can be determined by

considering sets of features, we propose to summarise each cluster contributing to a consensus by its geometric median in the feature space. This can for instance be visualised in a heat map. Our study demonstrates that clustering the matrix of these geometric medians can generate  
355 informative consensus clusters.

Our analyses showed that GeoWaVe consistently outperformed HGPA, MCLA and HBGF. The use of geometric medians also provided a useful visual aid when choosing the number of consensus clusters to be formed. By visualising the heat map of geometric medians in combination with *t*-SNE, UMAP or PHATE embeddings, a suitable number of partitions can  
360 easily be estimated. This allows the investigator to introduce informative priors and select clusters based on knowledge of the underlying biology. If uncertain, a range of partitions can be searched using the ConsensusClusterPlus method [21].

The use of geometric medians as a heuristic is not without limitations. Summarising a cluster using the geometric median tells little of the topology, and a significant loss of information  
365 may result in misinformed consensus clusters that are not representative of the data themselves. Additionally, the optimal choice of clustering method applied to the matrix of geometric medians is not immediately apparent and performance can vary depending on the data – for instance, this choice was important to the performance on the *Samusik* dataset, but less relevant for *Levine-32*. Of note, the use of a heuristic means that the run-time of GeoWaVe is fast  
370 enough to accommodate hyperparameter tuning. The investigator is therefore encouraged to experiment with different clustering algorithms and hyperparameters and inspect the partitions on the geometric median heat maps and embeddings generated from a suitable dimension reduction technique. Although this fails to remove the exploratory approach to clustering of cytometry data, it introduces the multi-view consensus necessary for robust results.



375 Webber *et al.* [5] performed a similar assessment of clustering algorithms without the focus on  
consensus methods and framed their assessment as a classification problem, inspired by the  
work by Samusik *et al.* [15]. They chose to use F1 score by first mapping clusters to ground-  
truth labels using the Hungarian algorithm and maximising F1 scores across reference  
380 that GeoWaVe ensemble methods outperform the graph ensemble methods of HGPA, MCLA  
and HBGF. Closer inspection of individual population F1 scores revealed that rare cell  
populations were often not identified by graph ensemble methods. Although identification of  
these subsets was improved in GeoWaVe, performance was often worse than individual  
clustering algorithms and some populations, such as platelets in the *Levine-13* data, remained  
385 unidentified.

There is a significant flaw in the assessment of clustering performance through F1 score.  
Mapping clusters to ground-truth labels in such a way implies that a one-to-one relationship  
must exist between the clusters generated and the reference populations. Clustering analysis  
can be complicated by sub-structures in data captured as clusters but absent in the ground-truth  
390 labels. If the purpose of clustering cytometry data is to identify a precise number of clusters,  
then this form of evaluation seems justified although one could argue that in such a scenario a  
supervised classification approach might be more suitable. Clustering analysis tends to be  
applied in the interest of discovery when the number of clusters is unknown. Despite this flaw  
it was deemed necessary to replicate the methods of Webber *et al.* [5], which was informative  
395 of the role population size plays. It showed that although the consensus clustering of geometric  
medians outperforms graph-based methods, there is still work to be done to ensure rare cell  
populations do not go undetected with this technique. It would be advisable that if rare cell  
populations are suspected to be present, that the consensus is formed by methods with high  
resolution such as those formed on nearest-neighbour graphs [14, 15, 20].

400 Future work should focus on more diverse ensemble clustering. In this work, four classes of  
algorithm were chosen based on their popularity in the cytometry literature and their available  
implementations. However, there is a wide variety of further clustering algorithms that could  
be explored for inclusion in ensemble clustering. There are ongoing efforts to address the  
computational complexity, such as improvements to SC3 [30]. Other solutions to the  
405 computational complexity may come from advances in the statistical and computational  
literature, such as consensus formed on heuristics of cluster similarity using metrics such as  
the Jaccard index [31]. In the meantime, clustering on geometric medians is likely to be a viable  
solution for cytometry data analysis. We are confident that the availability of user-friendly but  
powerful ensemble clustering methods has the potential to represent a major advance in big  
410 data analysis, with implications for an improved understanding of cellular responses, clinical  
conditions, and therapeutic and diagnostic options.

## Acknowledgements

We are grateful to all sepsis patients and their advocates for participating in this study and to the clinicians and nurses for their cooperation. We would also like to thank Jade Cole, Helen  
415 Hill, Loïc Raffray and Sarah Baker for their help and advice.

## Funding

This research received support from the European Regional Development Fund via the Welsh Government's Accelerate programme (M.E.), a Wellcome Trust Institutional Translational  
420 Partnership Award (ITPA) (R.J.B, S.M.C., M.P.M., A.A., M.E.), the Wales Data Nation Accelerator (WDNA) scheme (M.E.), a Health and Care Research Wales Clinical Research Time Award (M.P.M.) and a School of Medicine PhD Studentship (R.J.B.). The funders had no role in study design, data collection and analysis, decision to publish, or preparation of the manuscript.

425 *Conflict of interest:* none declared.

## Data availability statement

The *Levine-13*, *Levine-32* and *Samusik* datasets are available from Flow Repository, repository number FR-FCM-ZZPH provided by Weber *et al* [2]. The *Sepsis* data underlying this article  
430 will be shared on reasonable request to the corresponding author.

## References

1. Nima Aghaeepour, Greg Finak, Holger Hoos, Tim R. Mosmann, Ryan Brinkman, Raphael Gottardo, Richard H. Scheuermann, David Dougall, Alireza Hadj  
435 Khodabakhshi, Phillip Mah, Gerlinde Obermoser, Josef Spidlen, Ian Taylor, Sherry A. Wuensch, Jonathan Bramson, Connie Eaves, Andrew P. Weng, Edgardo S. Fortuno, Kevin Ho, Tobias R. Kollmann, Wade Rogers, Stephen De Rosa, Bakul Dalai, Ariful Azad, Alex Pothén, Aaron Brandes, Hannes Bretschneider, Robert Bruggner, Rachel Finck, Robin Jia, Noah Zimmerman, Michael Linderman, David  
440 Dill, Gary Nolan, Cliburn Chan, Faysal El Khettabi, Kieran O’Neill, Maria Chikina, Yongchao Ge, Stuart Sealfon, István Sugár, Arvind Gupta, Parisa Shooshtari, Habil Zare, Philip L. De Jager, Mike Jiang, Jens Keilwagen, Jose M. Maisog, George Luta, Andrea A. Barbo, Peter Májek, Jozef Vilcek, Tapio Manninen, Heikki Huttunen, Pekka Ruusuvoori, Matti Nykter, Geoffrey J. McLachlan, Kui Wang, Iftekhar Naim,  
445 Gaurav Sharma, Radina Nikolic, Saumyadipta Pyne, Yu Qian, Peng Qiu, John Quinn, Andrew Roth, Pablo Meyer, Gustavo Stolovitzky, Julio Saez-Rodriguez, Raquel Norel, Madhuchhanda Bhattacharjee, Michael Biehl, Philipp Bucher, Kerstin Bunte, Barbara Di Camillo, Francesco Sambo, Tiziana Sanavia, Emanuele Trifoglio, Gianna Toffolo, S. D. Slavica Dimitrieva, Rene Dreos, Giovanna Ambrosini, Jan Grau, Ivo  
450 Grosse, Stefan Posch, Nicolas Guex, Miron Kursa, Witold Rudnicki, Bo Liu, Mark Maienschein-Cline, Petra Schneider, Michael Seifert, Marc Strickert, and Jose M.G. Vilar. Critical assessment of automated flow cytometry data analysis techniques. *Nature Methods*, 10(3):228–238, 2013.

2. Lukas M. Weber and Mark D. Robinson. Comparison of clustering methods for  
455 highdimensional single-cell flow and mass cytometry data. *Cytometry Part A*,  
89(12):1084–1096, 2016.
3. Melissa Cheung, Jonathan J. Campbell, Liam Whitby, Robert J. Thomas, Julian  
Braybrook, and Jon Petzing. Current trends in flow cytometry automated data analysis  
software. *Cytometry Part A*, 99(10):1007–1021, 2021.
- 460 4. Joydeep Ghosh and Ayan Acharya. Cluster ensembles. *WIREs Data Mining and  
Knowledge Discovery*, 1(4):305–315, 2011.
5. Tom Ronan, Zhijie Qi, and Kristen M. Naegle. Avoiding common pitfalls when  
clustering biological data. *Science Signaling*, 9(432):re6, 2016.
6. Christina Bligaard Pedersen and Lars Rønn Olsen. Algorithmic clustering of single  
465 cell cytometry data: how unsupervised are these analyses really? *Cytometry Part A*,  
97(3):219–221, 2020.
7. Tossapon Boongoen and Natthakan Iam-On. Cluster ensembles: A survey of  
approaches with recent extensions and applications. *Computer Science Review*, 28:1–  
25, 2018.
- 470 8. Sandro Vega-Pons and José Ruiz-Shulcloper. A survey of clustering ensemble  
algorithms. *Int. J. Pattern Recognit. Artif. Intell.*, 25:337–372, 2011.
9. Alexander Strehl and Joydeep Ghosh. Cluster ensembles — a knowledge reuse  
framework for combining multiple partitions. *J. Mach. Learn. Res.*, 3(Dec):583-617
10. Xiaoli Zhang Fern and Carla E. Brodley. Solving cluster ensemble problems by  
475 bipartite graph partitioning. In *Proceedings of the Twenty-First International*

Conference on Machine Learning, ICML '04, page 36, New York, NY, USA, 2004.

Association for Computing Machinery

- 480 11. Xiaoshu Zhu, Jian Li, Hong-Dong Li, Miao Xie, and Jianxin Wang. Sc-gpe: A graph partitioning-based cluster ensemble method for single-cell. *Frontiers in Genetics*, 11m 2020.
12. Vladimir Yu Kiselev, Kristina Kirschner, Michael T Schaub, Tallulah Andrews, Andrew Yiu, Tamir Chandra, Kedar N Natarajan, Wolf Reik, Mauricio Barahona, Anthony R Green, and Martin Hemberg. SC3: consensus clustering of single-cell RNA-seq data. *Nature Methods*, 14(5):483–486, 2017.
- 485 13. Yuchen Yang, Ruth Huh, Houston W Culpepper, Yuan Lin, Michael I Love, and Yun Li. SAFE-clustering: Single-cell Aggregated (from Ensemble) clustering for singlecell RNA-seq data. *Bioinformatics*, 35(8):1269–1277, 09 2018.
- 490 14. Jacob H. Levine, Erin F. Simonds, Sean C. Bendall, Kara L. Davis, El Ad D. Amir, Michelle D. Tadmor, Oren Litvin, Harris G. Fienberg, Astraea Jager, Eli R. Zunder, Rachel Finck, Amanda L. Gedman, Ina Radtke, James R. Downing, Dana Pe'er, and Garry P. Nolan. Data-Driven Phenotypic Dissection of AML Reveals Progenitor-like Cells that Correlate with Prognosis. *Cell*, 162(1):184–197, 2015.
- 495 15. Nikolay Samusik, Zinaida Good, Matthew H. Spitzer, Kara L. Davis, and Garry P. Nolan. Automated mapping of phenotype space with single-cell data. *Nature Methods*, 13(6):493–496, 2016.
16. Burton RJ, Ahmed R, Cuff SM, Baker S, Artemiou A, et al. (2021) CytoPy: An autonomous cytometry analysis framework. *PLOS Computational Biology* 17(6): e1009071.

17. Sofie Van Gassen, Britt Callebaut, Mary J. Van Helden, Bart N. Lambrecht, Piet  
500 Demeester, Tom Dhaene, and Yvan Saeys. Flowsom: Using self-organizing maps for  
visualization and interpretation of cytometry data. *Cytometry Part A*, 87(7):636–645,  
2015.
18. Kevin R. Moon, David van Dijk, Zheng Wang, Scott Gigante, Daniel B. Burkhardt,  
William S. Chen, Kristina Yim, Antonia van den Elzen, Matthew J. Hirn, Ronald R.  
505 Coifman, Natalia B. Ivanova, Guy Wolf, and Smita Krishnaswamy. Visualizing  
structure and transitions in high-dimensional biological data. *Nature Biotechnology*,  
37(12):1482–1492, 2019.
19. Peng Qiu, Erin F. Simonds, Sean C. Bendall, Kenneth D. Gibbs, Robert V. Bruggner,  
Michael D. Linderman, Karen Sachs, Garry P. Nolan, and Sylvia K. Plevritis.  
510 Extracting a cellular hierarchy from high-dimensional cytometry data with SPADE.  
*Nature Biotechnology*, 29(10):886–893, 2011
20. Shobana V Stassen, Dickson M D Siu, Kelvin C M Lee, Joshua W K Ho, Hayden K  
H So, and Kevin K Tsia. PARC: ultrafast and accurate clustering of phenotypic data  
of millions of single cells. *Bioinformatics*, 36(9):2778–2786, 01 2020.
- 515 21. Matthew D. Wilkerson and D. Neil Hayes. ConsensusClusterPlus: a class discovery  
tool with confidence assessments and item tracking. *Bioinformatics*, 26(12):1572–  
1573, 04 2010.
22. Takehiro Sano. ClusterEnsembles (<https://github.com/827916600/ClusterEnsembles>),  
2021.
- 520 23. F. Pedregosa, G. Varoquaux, A. Gramfort, V. Michel, B. Thirion, O. Grisel, M.  
Blondel, P. Prettenhofer, R. Weiss, V. Dubourg, J. Vanderplas, A. Passos, D.

Cournapeau, M. Brucher, M. Perrot, and E. Duchesnay. Scikit-learn: Machine learning in python. *Journal of Machine Learning Research*, 12:2825–2830, 2011.

24. Dale Roberts, Norman Mueller, and Alexis McIntyre. High-dimensional pixel  
525 composites from earth observation time series. *IEEE Transactions on Geoscience and Remote Sensing*, 55(11):6254–6264, 2017.

25. Hadjadj J, Yatim N, Barnabei L, Corneau A, Boussier J, Smith N, Péré H, Charbit B, Bondet V, Chenevier-Gobeaux C, Breillat P, Carlier N, Gauzit R, Morbieu C, Pène F, Marin N, Roche N, Szwebel TA, Merklings SH, Treluyer JM, Veyer D, Mouthon L,  
530 Blanc C, Tharaux PL, Rozenberg F, Fischer A, Duffy D, Rieux-Laucat F, Kernéis S, Terrier B. Impaired type I interferon activity and inflammatory responses in severe COVID-19 patients. *Science*. 2020 Aug 7;369(6504):718-724.

26. Mathew D, Giles JR, Baxter AE, Oldridge DA, Greenplate AR, Wu JE, Alanio C, Kuri-Cervantes L, Pampena MB, D'Andrea K, Manne S, Chen Z, Huang YJ, Reilly  
535 JP, Weisman AR, Ittner CAG, Kuthuru O, Dougherty J, Nzingha K, Han N, Kim J, Pattekar A, Goodwin EC, Anderson EM, Weirick ME, Gouma S, Arevalo CP, Bolton MJ, Chen F, Lacey SF, Ramage H, Cherry S, Hensley SE, Apostolidis SA, Huang AC, Vella LA; UPenn COVID Processing Unit, Betts MR, Meyer NJ, Wherry EJ. Deep immune profiling of COVID-19 patients reveals distinct immunotypes with  
540 therapeutic implications. *Science*. 2020 Sep 4;369(6508):eabc8511.

27. Arunachalam PS, Wimmers F, Mok CKP, Perera RAPM, Scott M, Hagan T, et al. Systems biological assessment of immunity to mild versus severe COVID-19 infection in humans. Vol. 369, *Science*. American Association for the Advancement of Science (AAAS); 2020. p. 1210–20.



- 545 28. Bolouri H, Speake C, Skibinski D, Long SA, Hocking AM, Campbell DJ, et al. The COVID-19 immune landscape is dynamically and reversibly correlated with disease severity. Vol. 131, *Journal of Clinical Investigation*. American Society for Clinical Investigation; 2021.
29. Christina Bligaard Pedersen and Lars Rønn Olsen. Algorithmic clustering of  
550 singlecell cytometry data—how unsupervised are these analyses really? *Cytometry Part A*, 97(3):219–221, 2020.
30. Fu Xiang Quah and Martin Hemberg. Sc3s - efficient scaling of single cell consensus clustering to millions of cells. *bioRxiv*, 2021.
31. Soufiane Khedairia and Mohamed Tarek Khadir. A multiple clustering combination  
555 approach based on iterative voting process. *Journal of King Saud University - Computer and Information Sciences*, 34(1):1370–1380, 2022.

## Figures

560

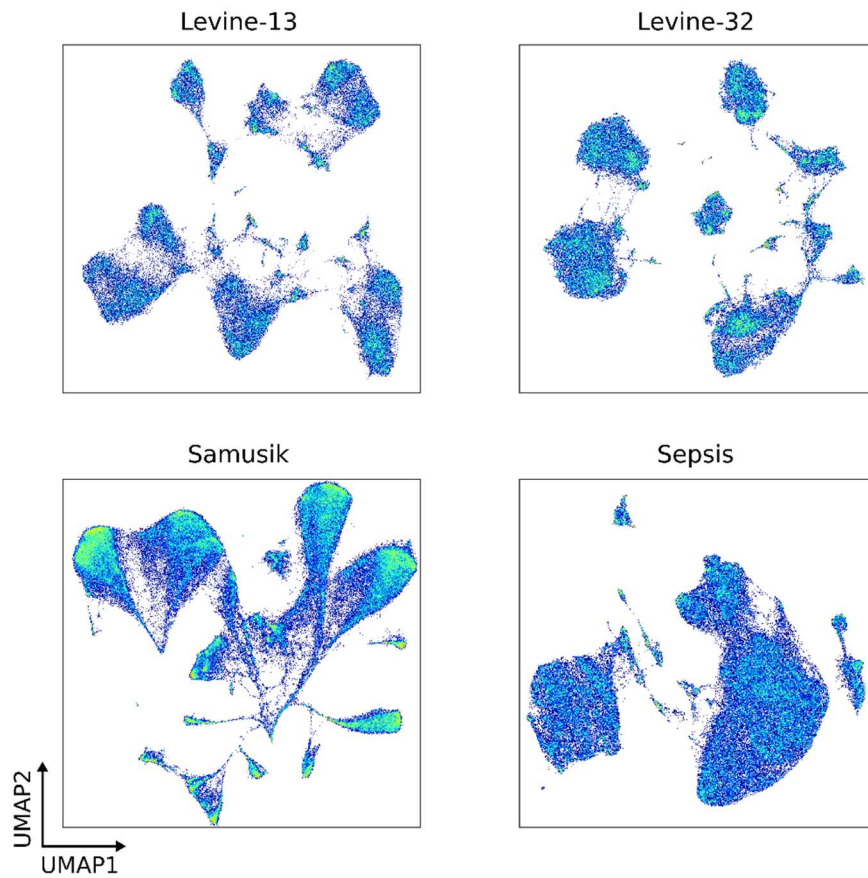

**Figure 1:** UMAP density plots of the *Levine-13*, *Levine-32*, *Samusik* and *Sepsis* data. Colour intensity corresponds to the density of observations in a region of events.

565

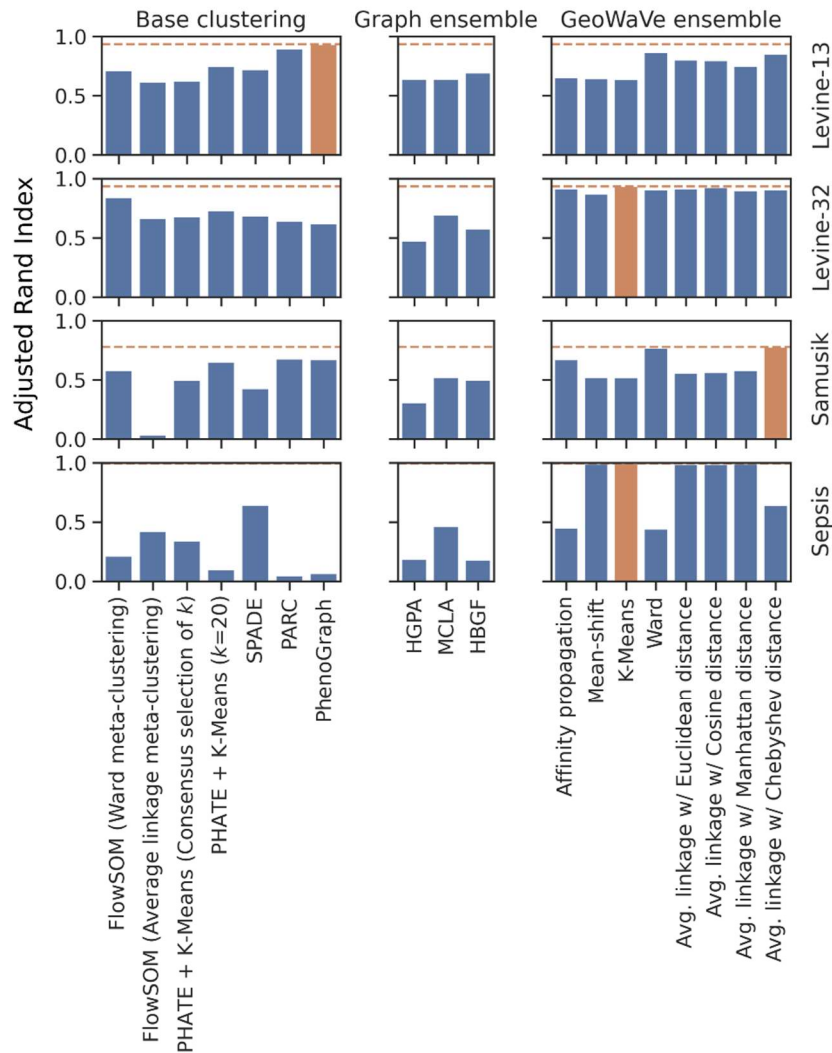

**Figure 2:** Adjusted rand index (ARI) for base clustering algorithms (left), graph ensemble methods (middle) and GeoWaVe ensemble (right) for the four benchmark datasets. ARI provides a measure of similarity between clusters and ground-truth labels by considering all pairs of observations. Pairs that are assigned to the same or different clusters in the predicted and ground-truth populations are counted and contrasted to mismatched pairs. The Rand Index can be described as a measure of the percentage of correct classifications by the clustering algorithm and is adjusted for chance by estimating the expected rand index using a permutation model, and then normalising by this expectation. ARI scores clustering results between  $-1$  and  $+1$ , where random label assignment will be negative or close to zero and perfect clustering will have an ARI close to  $+1$ . The best ARI score for each dataset is shown as a dotted orange line, and the best performing method for those data is coloured in orange.

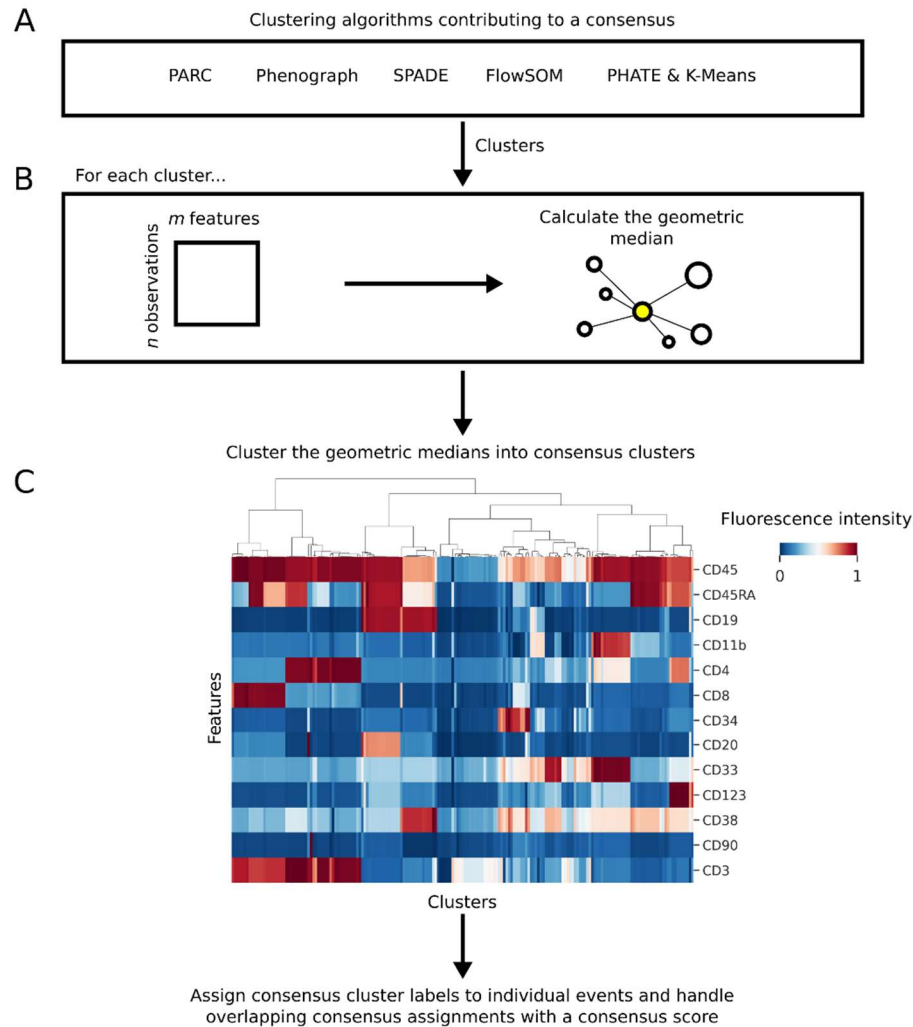

580

**Figure 3:** Schematic diagram of the GeoWaVe algorithm. (A) Clusters generated by multiple clustering algorithms are pooled, and (B) the geometric median for each cluster is calculated to create a matrix of  $c$  clusters. (C) This matrix of cluster geometric medians (clusters of the *Levine-13* data shown here as an example) is clustered into consensus clusters; groups of clusters within similar expression profiles. Consensus cluster labels are then assigned to individual events and overlapping consensus assignments handled with a score that accounts for the distance of the event to the members of each consensus cluster.

585

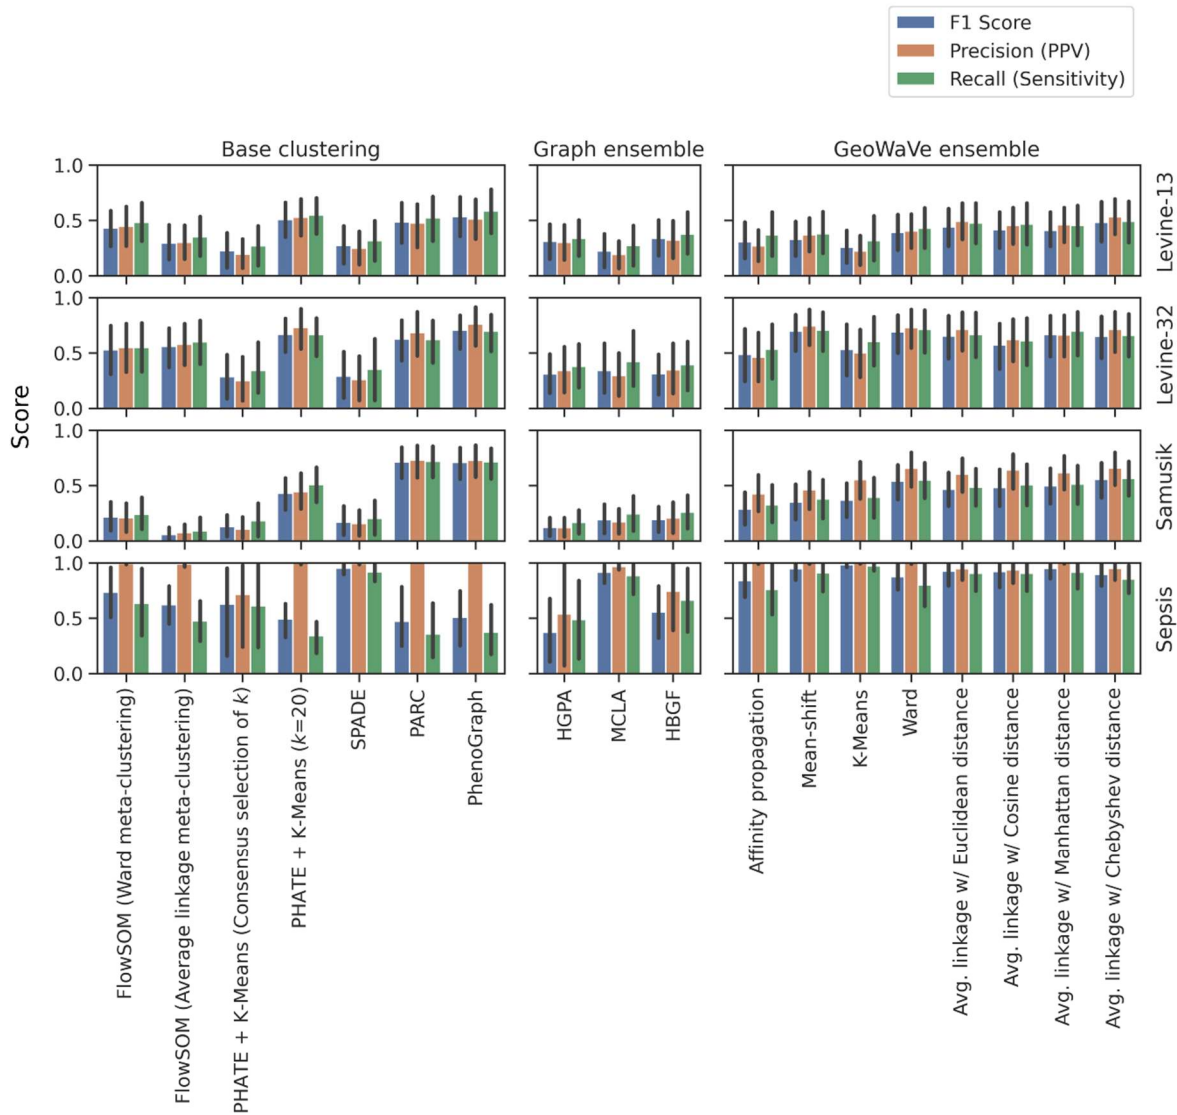

590

**Figure 4:** Performance of base clustering algorithms, graph ensembles and GeoWaVe ensembles, after matching cluster labels to ground-truth labels using the Hungarian linear assignment algorithm and maximising the sum of F1 scores across ground-truth label and cluster label pairings. Average precision (positive predictive value; PPV), recall (sensitivity) and F1 score are reported. Error bars represent 95% confidence intervals after bootstrap sampling of population values with 1000 rounds of re-sampling.

595

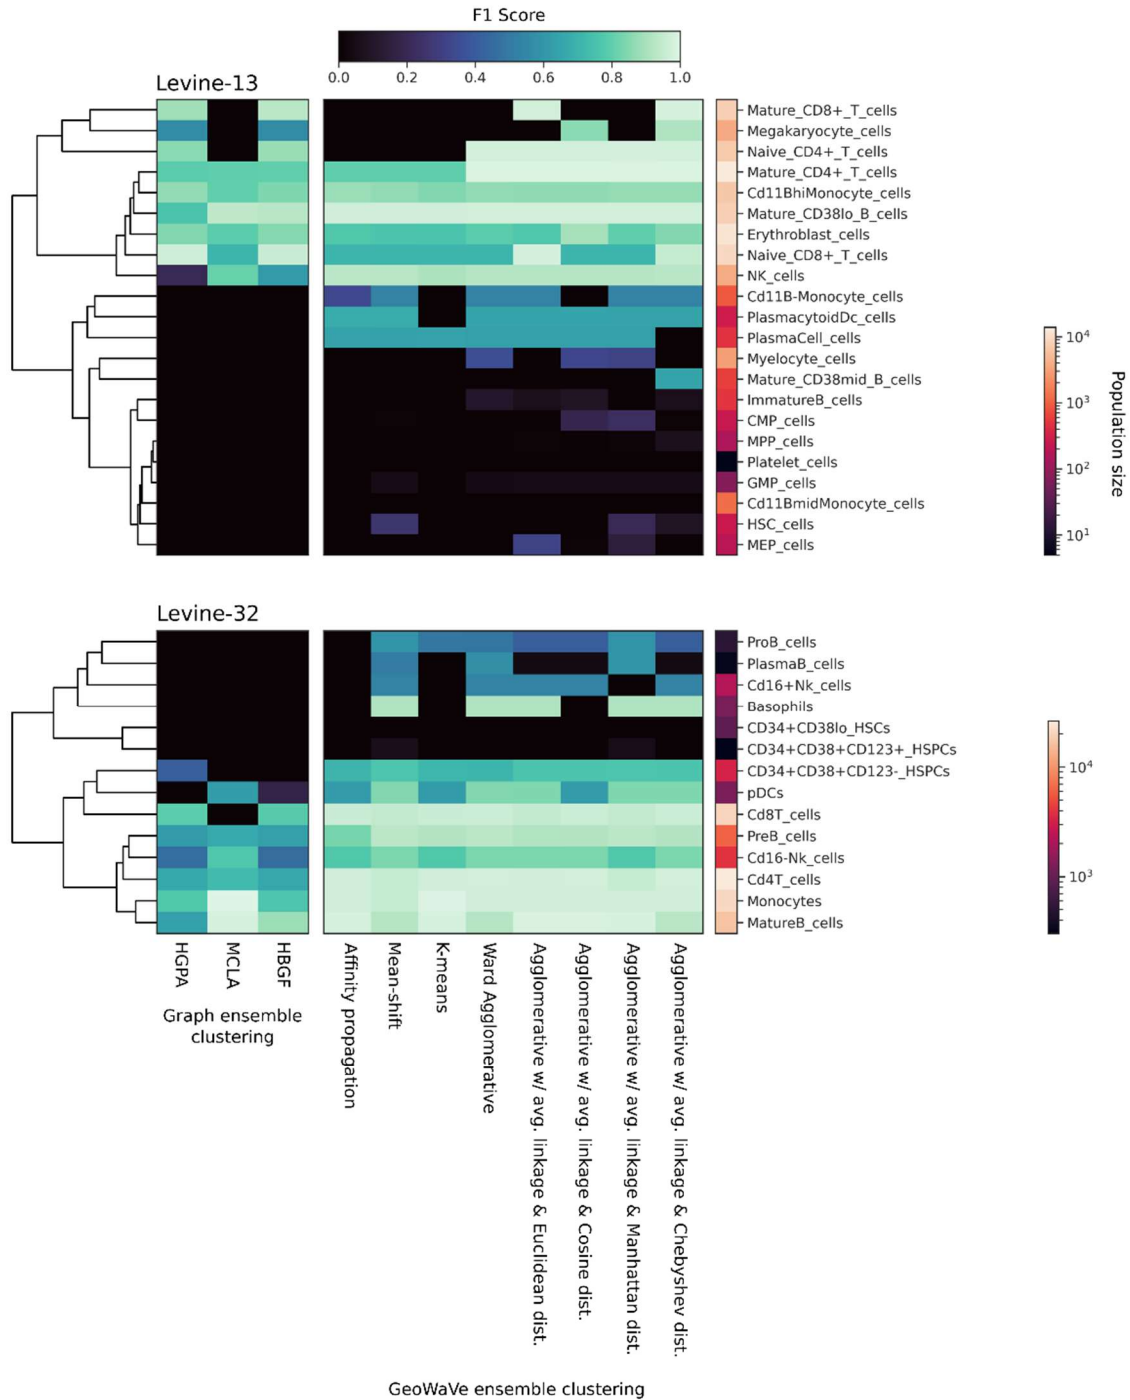

600 **Figure 5:** Heatmap of population F1 scores for the *Levine-13* (top) and *Levine-32* (bottom) data, with comparisons between graph ensemble methods (left) to GeoWaVe ensemble methods (right). Ground-truth populations (rows) are coloured by F1 score in the central heatmaps, with darker colours indicating a lower F1 score. On the right y-axis each row is labelled with an additional heatmap that describes the log-normalised size of the population  
605 (total number of events).

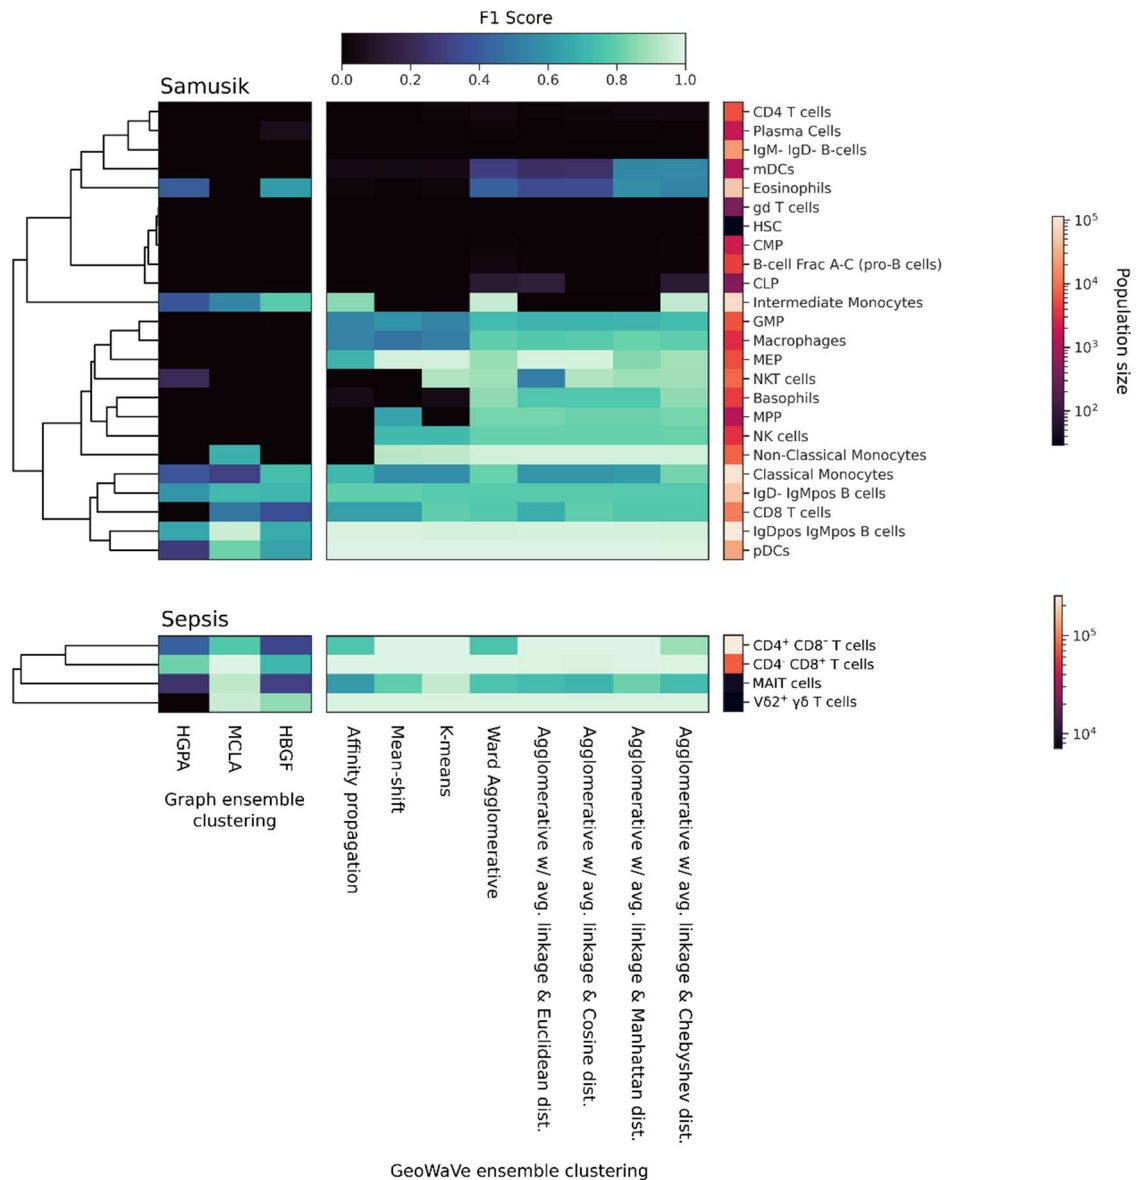

**Figure 6:** Heatmap of population F1 scores for the *Samusik* (top) and *Sepsis* (bottom) data, with comparisons between graph ensemble methods (left) to GeoWaVe ensemble methods (right). Ground-truth populations (rows) are coloured by F1 score in the central heatmaps, with darker colours indicating a lower F1 score. On the right y-axis each row is labelled with an additional heatmap that describes the log-normalised size of the population (total number of events).

615
